# Supplementary material
Source: HighWire-hosted journal article supplement (https://neurologyopen.bmj.com/content/5/1/e000423)
Supplement: inline-supplementary-material-1 [file inline-supplementary-material-1.pdf]

**SUPPLEMENTARY MATERIAL****TABLE OF CONTENTS**

|                                                 | Page |
|-------------------------------------------------|------|
| Title                                           | 1    |
| <i>List of supplementary Tables and Figures</i> | 2    |
| <i>Tables (start from)</i>                      | 3    |
| <i>Figures (start from)</i>                     | 6    |

**Title**

The effects of blood pressure and tranexamic acid in spontaneous intracerebral haemorrhage: a secondary analysis of a large randomised controlled trial

**LIST OF SUPPLEMENTARY TABLES AND FIGURES**

|                | <b>Title</b>                                                                                                                   | <b>Page</b> |
|----------------|--------------------------------------------------------------------------------------------------------------------------------|-------------|
| <b>Tables</b>  |                                                                                                                                |             |
| 1              | <i>Investigator-reported final diagnosis by pre-randomisation baseline systolic blood pressure</i>                             | 3           |
| 2              | <i>Sub-categories of serious adverse events by randomised treatment and pre-randomisation baseline systolic blood pressure</i> | 4           |
| 3              | <i>Blood pressure lowering treatments post-randomisation split by pre-randomisation systolic blood pressure</i>                | 5           |
| <b>Figures</b> |                                                                                                                                |             |
| 1              | <i>Effect of tranexamic acid vs. placebo on primary outcome (mRS) by day 2 systolic blood pressure in 20 mmHg increments</i>   | 6           |
| 2              | <i>Blood pressure lowering therapy between randomisation and day 2, over the course of the trial</i>                           | 7           |

**TABLES****Supplementary Table 1: Investigator-reported final diagnosis by pre-randomisation baseline systolic blood pressure.**

Data are number (%); comparison across groups by Chi-square test

|                                                        | All         | SBP $\leq$ 170 mmHg | SBP >170 mmHg | p                |
|--------------------------------------------------------|-------------|---------------------|---------------|------------------|
| Intracerebral haemorrhage with no underlying cause (%) | 1019 (43.8) | 583 (50.6)          | 436 (37.2)    | <b>&lt;0.001</b> |
| Intracerebral haemorrhage with underlying cause (%)    | 1289 (55.4) | 559 (48.5)          | 730 (62.2)    | <b>&lt;0.001</b> |
| Cerebral amyloid angiopathy                            | 80 (3.4)    | 58 (5.0)            | 22 (1.9)      | <b>&lt;0.001</b> |
| Arteriovenous malformation (AVM)                       | 25 (1.1)    | 15 (1.3)            | 10 (0.9)      | 0.32             |
| Tumour                                                 | 5 (0.2)     | 4 (0.3)             | 1 (0.1)       | 0.21             |
| Aneurysm                                               | 13 (0.6)    | 8 (0.7)             | 5 (0.4)       | 0.42             |
| Venous infarct                                         | 5 (0.2)     | 3 (0.3)             | 2 (0.2)       | 0.68             |
| Coagulopathy                                           | 25 (1.1)    | 15 (1.3)            | 10 (0.9)      | 0.07             |
| Hypertensive arteriopathy                              | 1121 (48.2) | 449 (39.0)          | 672 (57.3)    | <b>&lt;0.001</b> |
| Other                                                  | 33 (1.4)    | 16 (1.4)            | 17 (1.4)      | 0.99             |
| Ischaemic stroke with haemorrhagic transformation (%)  | 5 (0.2)     | 3 (0.3)             | 2 (0.2)       | 0.68             |
| Non-stroke/other (%)                                   | 11 (0.5)    | 7 (0.6)             | 4 (0.3)       | 0.38             |

SBP: systolic blood pressure

**Supplementary Table 2: Sub-categories of serious adverse events by randomised treatment and pre-randomisation baseline systolic blood pressure**

Data are number (%); comparison across randomised treatment groups by Chi-square test

|                            | All        | Tranexamic acid | Placebo    | p            |
|----------------------------|------------|-----------------|------------|--------------|
| <b>SBP ≤170 mmHg</b>       | 1152       | 590             | 562        |              |
| Nervous system disorders   | 391 (33.9) | 180 (30.5)      | 211 (37.5) | <b>0.012</b> |
| Cardiac disorders          | 70 (6.1)   | 38 (6.4)        | 32 (5.7)   | 0.60         |
| Respiratory disorders      | 156 (13.5) | 67 (11.4)       | 89 (15.8)  | <b>0.026</b> |
| Gastrointestinal disorders | 15 (1.3)   | 7 (1.2)         | 8 (1.4)    | 0.72         |
| Genitourinary disorders    | 12 (1)     | 6 (1)           | 6 (1.1)    | 0.93         |
| Haematological disorders   | 4 (0.3)    | 2 (0.3)         | 2 (0.4)    | 0.96         |
| Musculoskeletal disorders  | 12 (1)     | 6 (1)           | 6 (1.1)    | 0.93         |
| Miscellaneous              | 25 (2.2)   | 18 (3.1)        | 7 (1.2)    | <b>0.036</b> |
| <b>SBP &gt;170 mmHg</b>    | 1173       | 571             | 602        |              |
| Nervous system disorders   | 394 (33.6) | 195 (34.2)      | 199 (33.1) | 0.69         |
| Cardiac disorders          | 60 (5.1)   | 31 (5.4)        | 29 (4.8)   | 0.64         |
| Respiratory disorders      | 141 (12)   | 65 (11.4)       | 76 (12.6)  | 0.51         |
| Gastrointestinal disorders | 9 (0.8)    | 5 (0.9)         | 4 (0.7)    | 0.68         |
| Genitourinary disorders    | 23 (2)     | 11 (1.9)        | 12 (2)     | 0.93         |
| Haematological disorders   | 2 (0.2)    | 0               | 2 (0.3)    | 0.17         |
| Musculoskeletal disorders  | 12 (1)     | 5 (0.9)         | 7 (1.2)    | 0.63         |
| Miscellaneous              | 27 (2.3)   | 14 (2.5)        | 13 (2.2)   | 0.74         |

**Supplementary Table 3: Blood pressure lowering treatments post-randomisation split by pre-randomisation baseline systolic blood pressure.** Data are number (%); comparison across randomised treatment groups by Chi-square test or Kruskal-Wallis test

|                                             | Overall     | SBP ≤170 mmHg | SBP >170 mmHg | p      |
|---------------------------------------------|-------------|---------------|---------------|--------|
| BP lowering drugs used, yes (%)             | 1736 (74.9) | 696 (60.5)    | 1040 (89.2)   | <0.001 |
| No. of BP lowering drugs used, median [IQR] | 1 [0,2]     | 1 [0,2]       | 2 [1,3]       | <0.001 |
| No. of BP lowering drugs used (%)           |             |               |               | <0.001 |
| 0                                           | 581 (25.1)  | 455 (39.5)    | 126 (10.8)    |        |
| 1                                           | 678 (29.3)  | 317 (27.5)    | 361 (31)      |        |
| 2                                           | 561 (24.2)  | 207 (18)      | 354 (30.4)    |        |
| 3                                           | 320 (13.8)  | 114 (9.9)     | 206 (17.7)    |        |
| 4                                           | 121 (5.2)   | 45 (3.9)      | 76 (6.5)      |        |
| 5                                           | 42 (1.8)    | 8 (0.7)       | 34 (2.9)      |        |
| Route of BP lowering drug (%)               |             |               |               |        |
| Oral                                        | 952 (40.9)  | 410 (35.6)    | 542 (46.2)    | <0.001 |
| Nasogastric                                 | 90 (3.9)    | 36 (3.1)      | 54 (4.6)      | 0.07   |
| Intravenous                                 | 1299 (55.9) | 422 (36.6)    | 877 (74.8)    | <0.001 |
| Patch                                       | 235 (10.1)  | 93 (8.1)      | 142 (12.1)    | 0.001  |
| Class of antihypertensive used (%)          |             |               |               |        |
| ACEi                                        | 444 (19.1)  | 190 (16.5)    | 254 (21.7)    | 0.002  |
| ARB                                         | 100 (4.3)   | 45 (3.9)      | 55 (4.7)      | 0.35   |
| α-blocker                                   | 157 (6.8)   | 62 (5.4)      | 95 (8.1)      | 0.009  |
| β-blocker (including labetalol)             | 927 (39.9)  | 316 (27.4)    | 611 (52.1)    | <0.001 |
| Calcium channel blocker                     | 749 (32.2)  | 291 (25.3)    | 458 (39)      | <0.001 |
| Diuretic                                    | 295 (12.7)  | 120 (10.4)    | 175 (14.9)    | 0.001  |
| Glyceryl trinitrate                         | 678 (29.2)  | 222 (19.3)    | 456 (38.9)    | <0.001 |
| Nitrate                                     | 697 (30)    | 230 (20)      | 467 (39.8)    | <0.001 |

ACEi: angiotensin converting enzyme inhibitor; ARB: angiotensin receptor blocker; BP: blood pressure; IQR: interquartile range; SBP: systolic blood pressure.

**FIGURES****Supplementary Figure 1: Effect of tranexamic acid vs. placebo on primary outcome (mRS) by day 2 systolic blood pressure in 20 mmHg increments**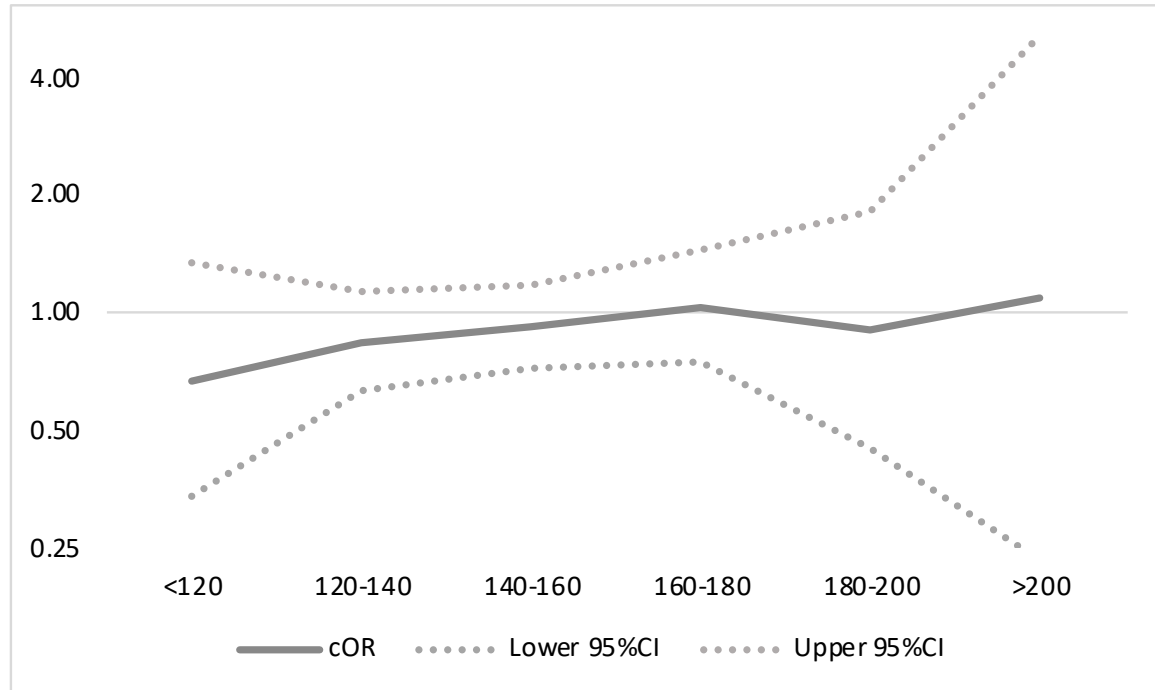

Ordinal logistic regression with adjustment for prognostic variables. CI: confidence interval; cOR: common odds ratio; mRS: modified Rankin Scale.

**Supplementary Figure 2: Blood pressure lowering therapy between randomisation and day 2, over the course of the trial**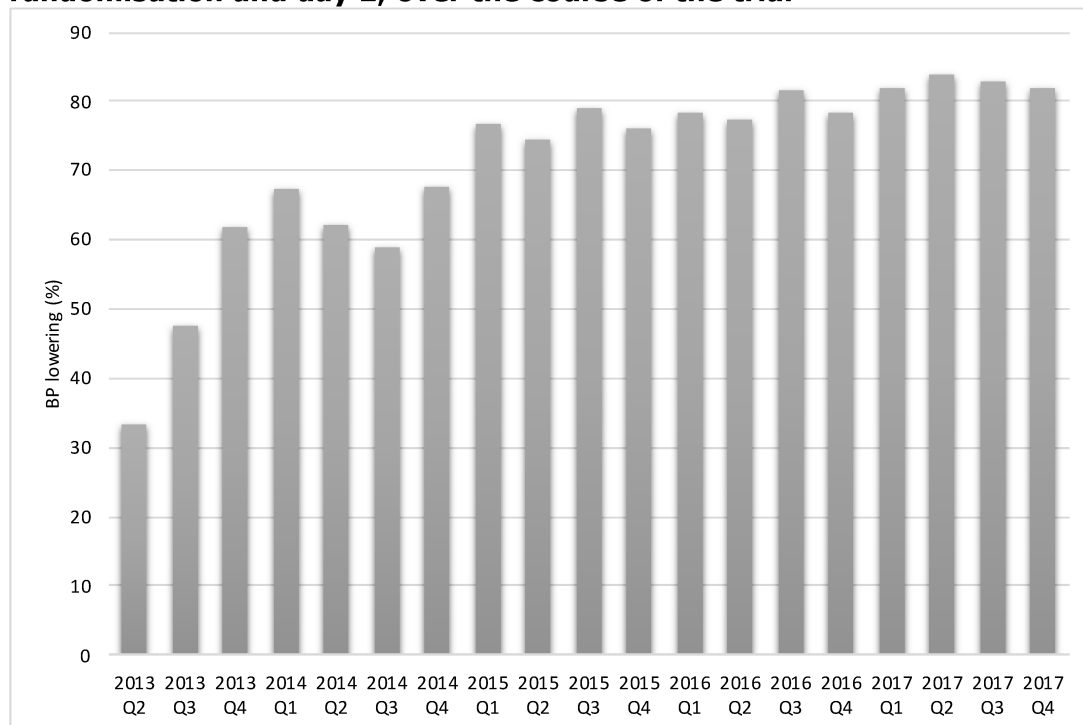

% of patients receiving BP lowering therapy on day 2 by quarter of recruitment throughout the trial.  $X^2$   $p < 0.001$  and Mantel-Haenszel test for trend  $p < 0.001$  for change in BP lowering over time
